# Supplementary material
Source: PubMed Central journal article supplement (PMC3058394)
Supplement: NIHMS247148-supplement-01.pdf [file NIHMS247148-supplement-01.pdf]

**Figure S1. Participant Flow Through Study**

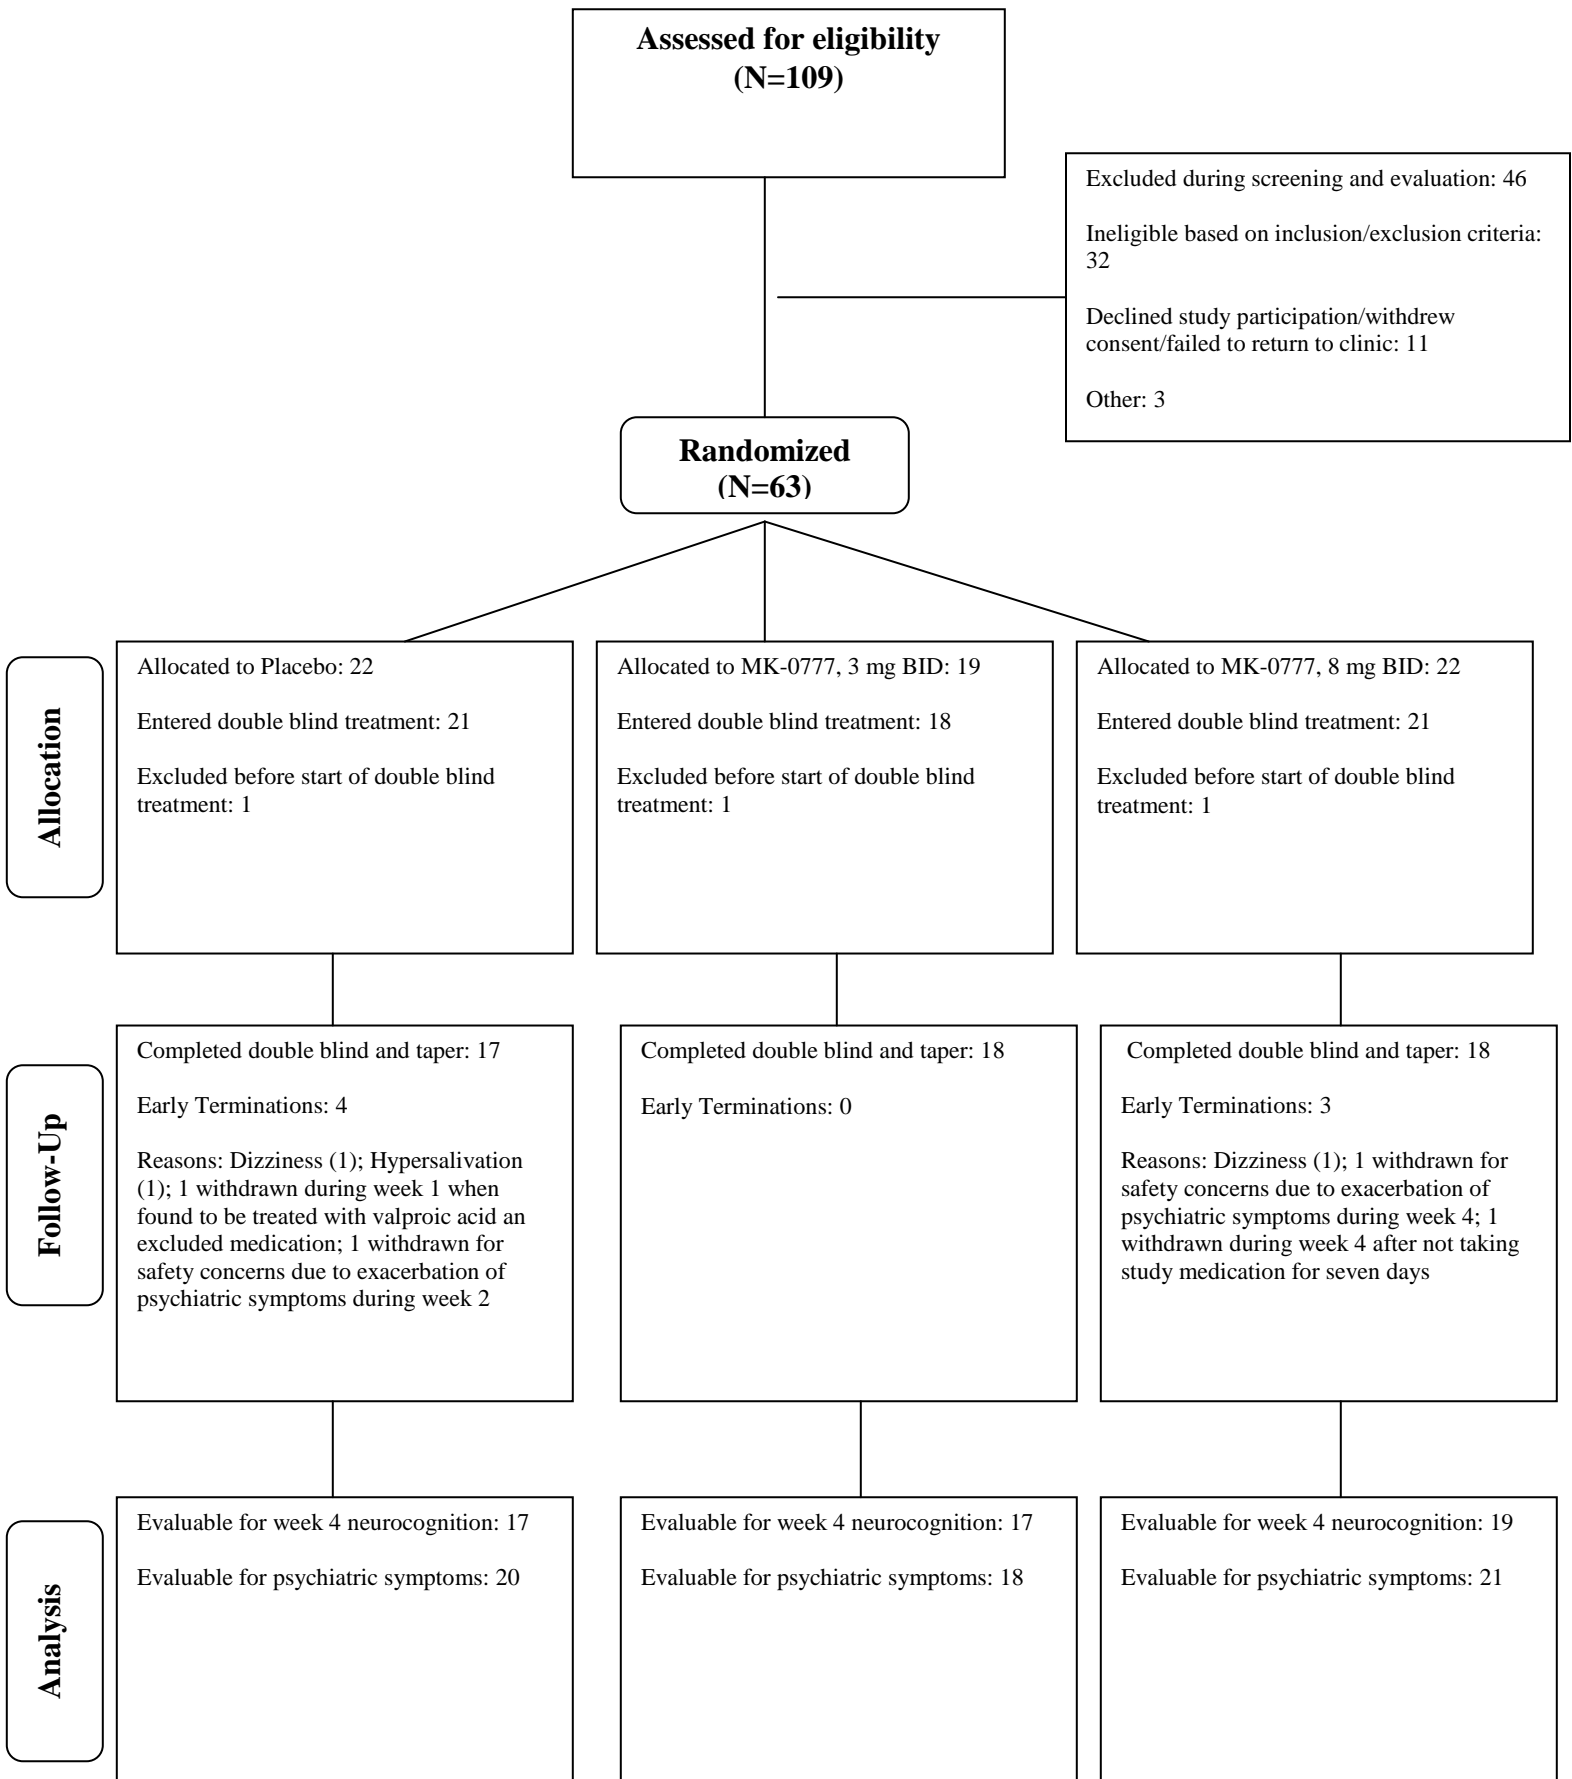

**Table S1.** MCCB: Reliability and Learning Effects

| <b>Domain (measure)</b>               | <b>Test-Retest Reliability</b> | <b>Learning Effects in Placebo Group</b> |                  |                       |
|---------------------------------------|--------------------------------|------------------------------------------|------------------|-----------------------|
|                                       |                                | <b>Mean Diff.</b>                        | <b>SD (diff)</b> | <b><i>p</i> value</b> |
| MCCB Composite Score                  | 0.95                           | 2.47                                     | 1.94             | <0.001                |
| Attention/Vigilance (CPT-IP)          | 0.80                           | -0.71                                    | 7.09             | 0.69                  |
| Processing Speed                      | 0.89                           | 1.12                                     | 4.76             | 0.35                  |
| Visual Learning (BVMT-R)              | 0.84                           | 3.24                                     | 6.72             | 0.06                  |
| Verbal Learning (HVLN-R)              | 0.72                           | 3.47                                     | 6.76             | 0.05                  |
| Social Cognition (MSCEIT)             | 0.78                           | -1.24                                    | 7.38             | 0.50                  |
| Reasoning/Problem-Solving (NAB Mazes) | 0.84                           | 3.94                                     | 3.80             | <0.001                |
| Working Memory                        | 0.90                           | 1.00                                     | 5.53             | 0.47                  |

BVMT-R, Brief Visuospatial Memory Test Revised; CPT-IP, Identical Pairs Continuous Performance Test; HVLN-R, Hopkins Verbal Learning Test, Revised; MCCB, MATRICS Consensus Cognitive Battery; MSCEIT, Mayer-Salovey-Caruso Emotional Intelligence Test; NAB, Neuropsychological Assessment Battery.

Test-retest reliability was calculated using the Pearson correlation coefficient (*r*) and is based on data from all participants who had valid baseline and end-of-study data.

**Table S2.** AX-CPT and N-Back: Reliability and Learning Effects

| <b>Domain (measure)</b>    | <b>Test-Retest Reliability</b> | <b>Learning Effects in Placebo Group</b> |                  |                       |
|----------------------------|--------------------------------|------------------------------------------|------------------|-----------------------|
|                            |                                | <b>Mean Diff.</b>                        | <b>SD (diff)</b> | <b><i>p</i> value</b> |
| AX-CPT d-prime             | 0.67                           | -0.24                                    | 1.24             | 0.45                  |
| N-Back d-prime             |                                |                                          |                  |                       |
| 0-back (all non-targets)   | 0.68                           | -0.01                                    | 0.50             | 0.94                  |
| 1-back (all non-targets)   | 0.84                           | 0.08                                     | 0.52             | 0.55                  |
| 2-back (all non-targets)   | 0.82                           | 0.24                                     | 0.46             | 0.04                  |
| 2-Back response times      |                                |                                          |                  |                       |
| Target hit                 | 0.78                           | 43.8                                     | 188.7            | 0.35                  |
| Novel correct rejection    | 0.54                           | -137.2                                   | 454.3            | 0.23                  |
| Repeated correct rejection | 0.78                           | -11.4                                    | 231.9            | 0.84                  |

AX-CPT, modified Continuous Performance Test.

Test-retest reliability was calculated using the Pearson correlation coefficient ( $r$ ) and is based on data from all participants who had valid baseline and end-of-study data.

**Table S3.** UPSA Summary and Component Scores, mean ( $\pm$ SD)\*

| Measure                    | Week | Placebo     | MK-0777,<br>3 mg BID | MK-0777,<br>8 mg BID | ANCOVA |      |      |
|----------------------------|------|-------------|----------------------|----------------------|--------|------|------|
|                            |      |             |                      |                      | F      | df   | p    |
| UPSA Summary               | 0    | 95.0 (16.2) | 85.0 (18.8)          | 91.7 (13.4)          | 0.77   | 2,50 | 0.47 |
|                            | 4    | 96.5 (15.5) | 86.3 (18.7)          | 90.4 (12.8)          |        |      |      |
| Communication              | 0    | 14.0 (3.8)  | 12.4 (4.1)           | 13.9 (4.2)           | 0.36   | 2,50 | 0.70 |
|                            | 4    | 14.4 (2.8)  | 13.1 (4.2)           | 13.7 (2.9)           |        |      |      |
| Comprehension/<br>Planning | 0    | 15.1 (3.4)  | 12.9 (3.4)           | 12.9 (3.9)           | 3.76   | 2,50 | 0.03 |
|                            | 4    | 16.6 (2.9)  | 13.1 (3.9)           | 12.3 (4.5)           |        |      |      |
| Financial Skills           | 0    | 18.1 (2.8)  | 16.4 (4.6)           | 16.9 (2.8)           | 0.11   | 2,50 | 0.90 |
|                            | 4    | 17.6 (3.3)  | 16.3 (3.1)           | 16.9 (2.8)           |        |      |      |
| Household                  | 0    | 15.6 (5.3)  | 15.3 (5.3)           | 15.8 (3.4)           | 0.10   | 2,50 | 0.90 |
|                            | 4    | 15.9 (5.4)  | 15.3 (4.0)           | 16.1 (3.9)           |        |      |      |
| Medication<br>Management   | 0    | 16.4 (3.3)  | 14.0 (5.0)           | 16.6 (2.1)           | 0.00   | 2,50 | 1.00 |
|                            | 4    | 16.4 (3.5)  | 14.5 (4.5)           | 16.5 (2.4)           |        |      |      |
| Transportation             | 0    | 15.8 (2.8)  | 14.0 (3.9)           | 15.6 (3.1)           | 0.21   | 2,50 | 0.81 |
|                            | 4    | 15.6 (3.3)  | 14.1 (2.9)           | 14.9 (4.0)           |        |      |      |

UPSA, UCSD Performance-Based Skills Assessment.

The UPSA Summary score has a range from 0 to 120, and each domain score has a range from 0 to 20.

\* There was no significant variation in the magnitude of treatment differences among the UPSA component scores:  $F = 0.81, df = 10, 66.8, p = 0.62$ .

**Table S4.** SCoRS Ratings by Treatment, mean ( $\pm$ SD)

| Measure                      | Week   | Placebo                | MK-0777,<br>3 mg BID   | MK-0777,<br>8 mg BID   | ANCOVA |      |          |
|------------------------------|--------|------------------------|------------------------|------------------------|--------|------|----------|
|                              |        |                        |                        |                        | F      | df   | <i>p</i> |
| Interviewer<br>Global Rating | 0<br>4 | 3.8 (2.3)<br>3.6 (1.8) | 4.8 (2.3)<br>4.6 (2.1) | 4.1 (2.3)<br>4.0 (2.4) | 0.17   | 2,47 | 0.84     |
| Interviewer Change<br>Rating | -      | 4.3 (0.6)              | 4.2 (0.8)              | 4.4 (1.0)              | 0.48   | 2,47 | 0.62     |
| Subject Change<br>Rating     | -      | 4.8 (1.0)              | 4.6 (1.6)              | 4.6 (1.1)              | 0.49   | 2,47 | 0.17     |
| Informant Change<br>Rating   | -      | 4.1 (0.4)              | 3.7 (1.3)              | 4.3 (1.6)              | 1.11   | 2,25 | 0.34     |

SCoRS, Schizophrenia Cognition Rating Scale.

The SCoRS Interviewer Global Rating of function has a range 1 to 10. The SCoRS interviewer, participant and informant change ratings range from 1 to 7.

**Table S5.** Frequency of Participants Reporting New or Worsened Side Effects During Treatment by Group

| Side effects       | Placebo |   |      | 3 mg MK-0777 |   |      | 8 mg MK-0777 |   |      | Fisher's exact test p-value |
|--------------------|---------|---|------|--------------|---|------|--------------|---|------|-----------------------------|
|                    | N       | n | %    | N            | n | %    | N            | n | %    |                             |
| Anorexia           | 21      | 3 | 14.3 | 18           | 2 | 11.1 | 21           | 3 | 14.3 | 1.000                       |
| Blurred vision     | 21      | 1 | 4.8  | 18           | 1 | 5.6  | 21           | 2 | 9.5  | 1.000                       |
| Bruising easily    | 21      | 0 | 0.0  | 18           | 1 | 5.6  | 21           | 1 | 4.8  | 0.751                       |
| Constipation       | 21      | 2 | 9.5  | 18           | 4 | 22.2 | 21           | 2 | 9.5  | 0.454                       |
| Diarrhea           | 21      | 0 | 0.0  | 18           | 3 | 16.7 | 21           | 3 | 14.3 | 0.147                       |
| Difficulty reading | 21      | 0 | 0.0  | 18           | 2 | 11.1 | 21           | 2 | 9.5  | 0.446                       |
| Dizziness          | 21      | 4 | 19.0 | 18           | 4 | 22.2 | 21           | 6 | 28.6 | 0.807                       |
| Dry mouth          | 21      | 4 | 19.0 | 18           | 3 | 16.7 | 21           | 5 | 23.8 | 0.922                       |
| Enuresis           | 21      | 0 | 0.0  | 18           | 2 | 11.1 | 21           | 3 | 14.3 | 0.255                       |
| Eye redness        | 21      | 0 | 0.0  | 18           | 1 | 5.6  | 21           | 0 | 0.0  | 0.300                       |
| Eyebrow pain       | 21      | 0 | 0.0  | 18           | 0 | 0.0  | 21           | 0 | 0.0  | 1.000                       |
| Fever              | 21      | 0 | 0.0  | 18           | 2 | 11.1 | 21           | 1 | 4.8  | 0.289                       |
| Headache           | 21      | 7 | 33.3 | 18           | 4 | 22.2 | 21           | 3 | 14.3 | 0.355                       |
| Hypersalivation    | 21      | 0 | 0.0  | 18           | 1 | 5.6  | 21           | 3 | 14.3 | 0.199                       |
| Insomnia           | 21      | 2 | 9.5  | 18           | 5 | 27.8 | 21           | 4 | 19.0 | 0.350                       |
| Light sensitivity  | 21      | 0 | 0.0  | 18           | 1 | 5.6  | 21           | 2 | 9.5  | 0.510                       |
| Malaise            | 21      | 1 | 4.8  | 18           | 5 | 27.8 | 21           | 2 | 9.5  | 0.143                       |
| Mucosal ulceration | 21      | 0 | 0.0  | 18           | 1 | 5.6  | 21           | 0 | 0.0  | 0.300                       |
| Nausea             | 21      | 1 | 4.8  | 18           | 3 | 16.7 | 21           | 4 | 19.0 | 0.401                       |
| Rash               | 21      | 1 | 4.8  | 18           | 0 | 0.0  | 21           | 0 | 0.0  | 1.000                       |
| Restlessness       | 21      | 4 | 19.0 | 18           | 3 | 16.7 | 21           | 4 | 19.0 | 1.000                       |
| Sedation           | 21      | 3 | 14.3 | 18           | 5 | 27.8 | 21           | 4 | 19.0 | 0.661                       |
| Sore throat        | 21      | 3 | 14.3 | 18           | 3 | 16.7 | 21           | 2 | 9.5  | 0.894                       |
| Stiffness          | 21      | 3 | 14.3 | 18           | 3 | 16.7 | 21           | 3 | 14.3 | 1.000                       |
| Tremor             | 21      | 5 | 23.8 | 18           | 1 | 5.6  | 21           | 2 | 9.5  | 0.254                       |
| Urticaria          | 21      | 0 | 0.0  | 18           | 2 | 11.1 | 21           | 2 | 9.5  | 0.446                       |
| Vomiting           | 21      | 2 | 9.5  | 18           | 4 | 22.2 | 21           | 3 | 14.3 | 0.599                       |

**Table S6.** Vital Signs Means at Baseline and Taper Visit

| Measure                           | Visit | Placebo |       |      | 3 mg MK-0777 |       |      | 8 mg MK-0777 |       |      | ANCOVA Test for Treatment Effect |    |         |                    |
|-----------------------------------|-------|---------|-------|------|--------------|-------|------|--------------|-------|------|----------------------------------|----|---------|--------------------|
|                                   |       | N       | Mean  | SD   | N            | Mean  | SD   | N            | Mean  | SD   | F                                | df | p value |                    |
| Sitting Diastolic Blood Pressure  | Base  | 21      | 80.2  | 8.8  | 18           | 76.5  | 7.4  | 21           | 76.95 | 8.6  | 0.78                             | 2  | 55.9    | 0.47               |
|                                   | EOS   | 17      | 82.1  | 9.3  | 18           | 74.7  | 8.5  | 20           | 75.10 | 11.5 |                                  |    |         |                    |
| Standing Diastolic Blood Pressure | Base  | 21      | 81.6  | 8.4  | 18           | 78.6  | 6.4  | 21           | 78.33 | 8.1  | 3.43                             | 2  | 55.8    | 0.04*              |
|                                   | EOS   | 17      | 85.5  | 8.8  | 18           | 76.2  | 11.2 | 20           | 77.70 | 10.0 |                                  |    |         |                    |
| Sitting Systolic Blood Pressure   | Base  | 21      | 125.4 | 13.1 | 18           | 122.8 | 14.8 | 21           | 119.4 | 12.3 | 2.67                             | 2  | 55.5    | 0.08               |
|                                   | EOS   | 17      | 127.4 | 15.4 | 18           | 120.4 | 17.7 | 20           | 119.0 | 16.4 |                                  |    |         |                    |
| Standing Systolic Blood Pressure  | Base  | 21      | 123.7 | 13.3 | 18           | 121.4 | 15.2 | 21           | 116.7 | 13.3 | 0.10                             | 2  | 55.8    | 0.90               |
|                                   | EOS   | 17      | 126.5 | 14.3 | 18           | 122.8 | 18.7 | 20           | 116.4 | 16.8 |                                  |    |         |                    |
| Weight (kg)                       | Base  | 21      | 99.8  | 22.5 | 18           | 87.6  | 23.2 | 21           | 84.4  | 18.1 | 3.13                             | 2  | 57.5    | 0.051 <sup>#</sup> |
|                                   | EOS   | 17      | 102.0 | 24.4 | 18           | 88.4  | 23.3 | 20           | 84.5  | 19.0 |                                  |    |         |                    |
| BMI (kg/m <sup>2</sup> )          | Base  | 21      | 33.6  | 8.0  | 18           | 30.0  | 6.7  | 21           | 28.9  | 7.3  | 2.80                             | 2  | 57.4    | 0.07               |
|                                   | EOS   | 17      | 34.6  | 8.5  | 18           | 30.2  | 6.5  | 20           | 29.1  | 7.7  |                                  |    |         |                    |

BMI, body mass index; EOS, end of study.

\* In the follow-up pair-wise comparisons, participants randomized to MK-0777 3 mg BID had a significant decrease in standing diastolic blood pressure compared to those randomized to placebo (mean difference ( $\pm$ SE):  $-3.57 \pm 1.41$  mmHg;  $t = 2.54$ ;  $df = 55.8$ ;  $p = 0.01$ ).

<sup>#</sup> In the follow-up pair-wise comparisons, there were significant group differences between placebo and the MK-0777 3 mg BID group (mean difference ( $\pm$ SE):  $1.12 \pm 0.55$  kg;  $t = 2.04$ ;  $df = 57.9$ ;  $p < 0.05$ ) and the MK-0777 8 mg BID group (mean difference ( $\pm$ SE):  $1.23 \pm 0.54$  kg;  $t = 2.30$ ;  $df = 60.0$ ;  $p = 0.025$ ).

**Table S7.** Laboratory Means at Baseline and Taper Visit

| Measure         | Visit | Placebo |        |       | 3 mg MK-0777 |        |       | 8 mg MK-0777 |        |       | ANCOVA Test for Treatment Effect |    |         |      |
|-----------------|-------|---------|--------|-------|--------------|--------|-------|--------------|--------|-------|----------------------------------|----|---------|------|
|                 |       | N       | Mean   | SD    | N            | Mean   | SD    | N            | Mean   | SD    | F                                | df | p value |      |
| GGT             | Base  | 21      | 39.81  | 33.13 | 18           | 33.56  | 15.35 | 20           | 33.90  | 21.73 |                                  |    |         |      |
| GGT             | Taper | 17      | 44.82  | 37.62 | 16           | 33.94  | 18.05 | 19           | 31.89  | 25.54 | 0.77                             | 2  | 48      | 0.47 |
| LDH             | Base  | 21      | 163.29 | 34.12 | 18           | 174.56 | 60.56 | 20           | 155.10 | 26.91 |                                  |    |         |      |
| LDH             | Taper | 17      | 160.41 | 31.38 | 18           | 175.00 | 42.97 | 19           | 169.95 | 39.19 | 0.92                             | 2  | 50      | 0.40 |
| AST (SGOT)      | Base  | 21      | 20.95  | 7.74  | 18           | 38.50  | 56.18 | 20           | 23.85  | 10.86 |                                  |    |         |      |
| AST (SGOT)      | Taper | 17      | 22.65  | 7.94  | 18           | 24.61  | 8.41  | 19           | 24.21  | 10.61 | 0.15                             | 2  | 50      | 0.86 |
| ALT (SGPT)      | Base  | 21      | 28.14  | 11.55 | 18           | 35.17  | 30.25 | 20           | 26.85  | 16.63 |                                  |    |         |      |
| ALT (SGPT)      | Taper | 17      | 32.00  | 18.14 | 18           | 26.61  | 13.28 | 19           | 27.11  | 22.27 | 0.93                             | 2  | 50      | 0.40 |
| Alk_Phosphatase | Base  | 21      | 81.86  | 16.83 | 18           | 82.83  | 22.65 | 20           | 76.90  | 24.55 |                                  |    |         |      |
| Alk_Phosphatase | Taper | 17      | 84.00  | 19.77 | 18           | 81.72  | 23.73 | 19           | 75.00  | 26.88 | 0.14                             | 2  | 50      | 0.87 |
| Tot_Bilirubin   | Base  | 21      | 0.51   | 0.17  | 18           | 0.52   | 0.25  | 20           | 0.50   | 0.26  |                                  |    |         |      |
| Tot_Bilirubin   | Taper | 17      | 0.51   | 0.26  | 18           | 0.54   | 0.43  | 19           | 0.55   | 0.35  | 0.07                             | 2  | 50      | 0.93 |
| Total_Protein   | Base  | 21      | 7.34   | 0.47  | 18           | 7.32   | 0.39  | 20           | 7.32   | 0.41  |                                  |    |         |      |
| Total_Protein   | Taper | 17      | 7.38   | 0.43  | 18           | 7.41   | 0.43  | 19           | 7.25   | 0.55  | 0.97                             | 2  | 50      | 0.39 |
| Albumin         | Base  | 21      | 4.38   | 0.29  | 18           | 4.37   | 0.31  | 20           | 4.32   | 0.26  |                                  |    |         |      |
| Albumin         | Taper | 17      | 4.35   | 0.32  | 18           | 4.41   | 0.38  | 19           | 4.35   | 0.24  | 0.13                             | 2  | 50      | 0.88 |
| Globulin        | Base  | 21      | 2.96   | 0.50  | 17           | 2.95   | 0.38  | 20           | 2.99   | 0.44  |                                  |    |         |      |
| Globulin        | Taper | 17      | 3.03   | 0.50  | 17           | 2.99   | 0.42  | 19           | 2.89   | 0.50  | 1.33                             | 2  | 49      | 0.28 |
| Glucose         | Base  | 21      | 98.05  | 13.15 | 18           | 98.22  | 15.42 | 20           | 98.90  | 23.17 |                                  |    |         |      |
| Glucose         | Taper | 17      | 100.71 | 21.27 | 18           | 107.61 | 37.58 | 19           | 99.42  | 23.63 | 0.67                             | 2  | 50      | 0.52 |
| BUN             | Base  | 21      | 13.52  | 4.29  | 18           | 12.89  | 4.01  | 20           | 12.70  | 3.80  |                                  |    |         |      |
| BUN             | Taper | 17      | 13.24  | 5.38  | 18           | 13.44  | 5.86  | 19           | 12.79  | 3.61  | 0.21                             | 2  | 50      | 0.81 |
| Creatinine      | Base  | 21      | 1.02   | 0.21  | 18           | 0.96   | 0.30  | 19           | 0.89   | 0.20  |                                  |    |         |      |
| Creatinine      | Taper | 17      | 1.01   | 0.18  | 18           | 0.97   | 0.31  | 19           | 1.02   | 0.58  | 1.25                             | 2  | 49      | 0.30 |
| Sodium          | Base  | 21      | 140.29 | 2.08  | 18           | 139.61 | 3.48  | 20           | 140.35 | 2.30  |                                  |    |         |      |
| Sodium          | Taper | 17      | 139.82 | 1.88  | 18           | 139.39 | 2.83  | 19           | 139.05 | 2.55  | 0.88                             | 2  | 50      | 0.42 |
| Potassium       | Base  | 21      | 4.11   | 0.34  | 18           | 4.14   | 0.37  | 20           | 4.22   | 0.32  |                                  |    |         |      |
| Potassium       | Taper | 17      | 4.08   | 0.22  | 18           | 4.08   | 0.36  | 19           | 4.18   | 0.32  | 0.21                             | 2  | 50      | 0.81 |
| Chloride        | Base  | 21      | 103.14 | 2.83  | 18           | 103.28 | 4.91  | 20           | 103.75 | 3.40  |                                  |    |         |      |
| Chloride        | Taper | 17      | 103.29 | 2.82  | 18           | 103.00 | 4.58  | 19           | 102.68 | 3.59  | 0.64                             | 2  | 50      | 0.53 |
| CO2             | Base  | 21      | 24.50  | 3.09  | 18           | 24.02  | 2.69  | 20           | 24.02  | 4.36  |                                  |    |         |      |
| CO2             | Taper | 17      | 23.36  | 2.95  | 18           | 23.33  | 3.72  | 19           | 24.38  | 3.29  | 1.89                             | 2  | 50      | 0.16 |
| Cholesterol     | Base  | 21      | 182.00 | 39.04 | 18           | 169.61 | 34.48 | 20           | 185.55 | 37.07 |                                  |    |         |      |
| Cholesterol     | Taper | 17      | 181.47 | 37.77 | 18           | 175.17 | 41.40 | 19           | 171.95 | 34.72 | 1.26                             | 2  | 50      | 0.29 |



## Supplemental Methods and Materials

### Slit-lamp eye examination results

Five people who participated in Merck sponsored studies of MK-0777 for the treatment of generalized anxiety disorder were observed to have cataracts on post-study slit-lamp eye examinations. There were no pre-study evaluations, which precluded any assessment of whether the observed cataracts were due to study participation. Regardless, in order to maximize the safety of our study participants, we excluded potential participants with a history of posterior subcapsular cataracts or age-inconsistent nuclear or cortical cataracts, or uveitis. The reason for excluding potential participants with uveitis is that uveitis is a risk factor for the development of cataracts.

A slit-lamp eye examination was conducted at Screening, end of the Treatment Phase, and 6 and 12 months after completion of the Treatment Phase. The Lens Opacities Classification System III (1) was used to grade cataracts and the grading scale developed by Gwon and colleagues (2) was used for the evaluation of uveitis.

Fifty-five post-randomization slit lamp eye examinations were performed: 48 were conducted in participants who completed the study and 7 were conducted in participants who terminated prior to completion. These included 15/18 participants randomized to MK-0777 3 mg BID, 19/21 participants randomized to MK-0777 8 mg BID, and 21/21 participants randomized to placebo. Three participants (one MK-0777 3 mg BID, one MK-0777 8 mg BID, and one placebo), all of whom completed double-blind treatment, were found to have positive findings on their follow-up examination. All reported findings were minimal to mild increases in nuclear color grade or nuclear opalescence grade. None of the participants developed posterior subcapsular cataracts nor did any exhibit any evidence of uveitis.

In summary, there was no evidence of increased incidence of clinically relevant cataracts or uveitis.

1. Chylack LT Jr, Wolfe JK, Singer DM, Leske C, Bullimore MA, Baily IL, *et al.* (1993): The Lens Opacities Classification System III. *Arch Ophthalmol* 111: 831-836.
2. Gwon A, Mantras C, Gruber L, Cunanan C (1993): Concanavalin A-induced posterior subcapsular cataract: a new model of cataractogenesis. *Invest Ophthalmol Vis Sci* 34: 3483-3488.
